# Supplementary material for: Novel ETV1 mutation in small cell lung cancer transformation resistant to EGFR tyrosine kinase inhibitors
Source: PubMed Central journal article supplement — Ann Transl Med. 2021 Jul;9(14):1150. doi: 10.21037/atm-21-2625 (PMC8350694; doi:10.21037/atm-21-2625), 2021-07
Supplement: atm-09-14-1150-supplementary.pdf [file atm-09-14-1150-supplementary.pdf]

Table S1 Genes list of the 639 DNA panel

|         |          |         |         |           |          |         |        |          |         |         |          |        |
|---------|----------|---------|---------|-----------|----------|---------|--------|----------|---------|---------|----------|--------|
| ABC1    | BRD4     | COL5A1  | EPCAM   | FGFR3     | HIST3H3  | KMT2B   | MSI2   | PCNA     | PTPRT   | SETD8   | TEK      | ZFH3   |
| ABC9    | BRIP1    | CREBBP  | EPHA3   | FGFR4     | HLA-A    | KMT2C   | MST1   | PDCD1    | QKI     | SF3B1   | TERT     | ZNF217 |
| ABL1    | BTG1     | CRKL    | EPHA5   | FH        | HLA-B    | KMT2D   | MST1R  | PDCD1LG2 | RAB35   | SGK1    | TET1     | ZNF703 |
| ABL2    | BTG2     | CRLF2   | EPHA7   | FLCN      | HLA-C    | KNSTRN  | MTAP   | PDGFRA   | RAC1    | SH2B3   | TET2     |        |
| ACE2    | BTK      | CSDE1   | EPHB1   | FLT1      | HLA-DRB1 | KRAS    | MTHFR  | PDGFRB   | RAC2    | SH2D1A  | TGFBR1   |        |
| ACVR1   | C10orf54 | CSF1R   | EPHB4   | FLT3      | HMGB1    | LATS1   | MTOR   | PDIA3    | RAD21   | SHOC2   | TGFBR2   |        |
| ACVR1B  | C11orf30 | CSF3R   | EPHX1   | FLT4      | HMG1     | LATS2   | MTRR   | PDK1     | RAD50   | SHQ1    | TIPARP   |        |
| AGO2    | C8orf34  | CTCF    | ERAP1   | FOXA1     | HNF1A    | LGALS9  | MUTYH  | PDPK1    | RAD51   | SLC34A2 | TMEM127  |        |
| AKT1    | CALR     | CTLA4   | ERAP2   | FOXL2     | HOXB13   | LGMN    | MYB    | PGR      | RAD51B  | SLCO1B1 | TMPRSS2  |        |
| AKT2    | CANX     | CTNNA1  | ERBB2   | FOXO1     | HRAS     | LIG1    | MYC    | PHF6     | RAD51C  | SLIT2   | TNF      |        |
| AKT3    | CARD11   | CTNNA1  | ERBB3   | FOXP1     | HSD3B1   | LIG3    | MYCL   | PHOX2B   | RAD51D  | SLX4    | TNFAIP3  |        |
| ALK     | CARM1    | CTSB    | ERBB4   | FRS2      | HSP90AA1 | LMO1    | MYCN   | PIK3C2B  | RAD52   | SMAD2   | TNFRSF14 |        |
| ALOX12B | CASP8    | CTSL    | ERCC1   | FUBP1     | ICOSLG   | LNPEP   | MYD88  | PIK3C2G  | RAD54L  | SMAD3   | TNFRSF9  |        |
| AMER1   | CBFB     | CTSS    | ERCC2   | FYN       | ID3      | LRP1B   | MYOD1  | PIK3C3   | RAF1    | SMAD4   | TNFSF14  |        |
| ANKRD11 | CBL      | CUL3    | ERCC3   | GABRA6    | IDE      | LTK     | NBN    | PIK3CA   | RANBP2  | SMARCA4 | TNFSF18  |        |
| APC     | CBR3     | CUL4A   | ERCC4   | GATA1     | IDH1     | LYN     | NCOA3  | PIK3CB   | RARA    | SMARCB1 | TNFSF4   |        |
| AR      | CCND1    | CXCR4   | ERCC5   | GATA2     | IDH2     | LZTR1   | NCOR1  | PIK3CD   | RASA1   | SMARCD1 | TNFSF9   |        |
| ARAF    | CCND2    | CYLD    | ERF     | GATA3     | IFI30    | MAF     | NEGR1  | PIK3CG   | RB1     | SMO     | TOP1     |        |
| ARFRP1  | CCND3    | CYP17A1 | ERG     | GATA4     | IFNGR1   | MAGI2   | NF1    | PIK3R1   | RBM10   | SMYD3   | TOP2A    |        |
| ARID1A  | CCNE1    | CYP19A1 | ERRF1   | GATA6     | IGF1     | MALT1   | NF2    | PIK3R2   | RECQL   | SNCAIP  | TP53     |        |
| ARID1B  | CD200    | CYP2C19 | ESR1    | GID4      | IGF1R    | MAP2K1  | NFE2L2 | PIK3R3   | RECQL4  | SOCS1   | TP53BP1  |        |
| ARID2   | CD22     | CYP2C8  | ETV1    | GLI1      | IGF2     | MAP2K2  | NFKBIA | PIM1     | REL     | SOD2    | TP63     |        |
| ARID5B  | CD274    | CYP2C9  | ETV4    | GNA11     | IKBKE    | MAP2K4  | NKX2-1 | PLCG2    | RET     | SOS1    | TP73     |        |
| ASXL1   | CD276    | CYP2D6  | ETV5    | GNA13     | IKZF1    | MAP3K1  | NKX3-1 | PLK2     | RFWD2   | SOX10   | TPMT     |        |
| ASXL2   | CD40     | CYP3A4  | ETV6    | GNAQ      | IL10     | MAP3K13 | NOTCH1 | PMAIP1   | RHEB    | SOX17   | TPP2     |        |
| ATM     | CD40LG   | CYSLTR2 | EWSR1   | GNAS      | IL7R     | MAP3K14 | NOTCH2 | PMS1     | RHOA    | SOX2    | TRAF2    |        |
| ATR     | CD48     | DAXX    | EXO1    | GPR124    | INHA     | MAPK1   | NOTCH3 | PMS2     | RICTOR  | SOX9    | TRAF7    |        |
| ATRX    | CD70     | DCUN1D1 | EZH1    | GPS2      | INHBA    | MAPK3   | NOTCH4 | PNRC1    | RIT1    | SPEN    | TSC1     |        |
| AURKA   | CD74     | DDR1    | EZH2    | GREM1     | INPP4A   | MAPKAP1 | NPEPPS | POLB     | RNF43   | SPOP    | TSC2     |        |
| AURKB   | CD79A    | DDR2    | EZR     | GRIN2A    | INPP4B   | MAX     | NPM1   | POLD1    | ROS1    | SPRED1  | TSHR     |        |
| AXIN1   | CD79B    | DHFR    | FAM175A | GRM3      | INPPL1   | MCL1    | NQO1   | POLE     | RPS6KA4 | SPTA1   | TYMS     |        |
| AXIN2   | CD80     | DICER1  | FAM46C  | GSK3B     | INSR     | MDC1    | NRAS   | PPARG    | RPS6KB2 | SRC     | TYRO3    |        |
| AXL     | CD86     | DIS3    | FAM58A  | GSTP1     | IRF2     | MDM2    | NRD1   | PPM1D    | RPTOR   | SRSF2   | U2AF1    |        |
| B2M     | CDA      | DMD     | FANCA   | H3F3A     | IRF4     | MDM4    | NSD1   | PPP2R1A  | RRAGC   | STAG2   | UGT1A1   |        |
| BABAM1  | CDC42    | DNAJB1  | FANCC   | H3F3B     | IRS1     | MED12   | NT5C2  | PPP2R2A  | RRAS    | STAT3   | UGT1A9   |        |
| BAP1    | CDC73    | DNMT1   | FANCD2  | H3F3C     | IRS2     | MEF2B   | NTHL1  | PPP4R2   | RRAS2   | STAT4   | UPF1     |        |
| BARD1   | CDH1     | DNMT3A  | FANCE   | HDAC1     | ITGAV    | MEN1    | NTRK1  | PPP6C    | RRM1    | STAT5A  | VEGFA    |        |
| BBC3    | CDK12    | DNMT3B  | FANCF   | HERC1     | ITGB3    | MERTK   | NTRK2  | PRDM1    | RSPO2   | STAT5B  | VHL      |        |
| BCL10   | CDK4     | DOT1L   | FANCG   | HGF       | JAK1     | MET     | NTRK3  | PRDM14   | RTEL1   | STK11   | VTCN1    |        |
| BCL2    | CDK6     | DPYD    | FANCL   | HIST1H1C  | JAK2     | MGA     | NUF2   | PREX2    | RUNX1   | STK19   | WHSC1    |        |
| BCL2L1  | CDK8     | DROSHA  | FAS     | HIST1H2BD | JAK3     | MICA    | NUP93  | PRKAR1A  | RUNX1T1 | STK40   | WHSC1L1  |        |
| BCL2L11 | CDKN1A   | DUSP4   | FAT1    | HIST1H3A  | JUN      | MICB    | NUTM1  | PRKCI    | RXRA    | SUFU    | WISP3    |        |
| BCL2L2  | CDKN1B   | DYNC2H1 | FBXW7   | HIST1H3B  | KAT6A    | MITF    | P2RY8  | PRKD1    | RYBP    | SUZ12   | WT1      |        |
| BCL6    | CDKN2A   | E2F3    | FGF10   | HIST1H3C  | KDM5A    | MKNK1   | PAK1   | PRKDC    | SDC4    | SYK     | WWTR1    |        |
| BCOR    | CDKN2B   | EED     | FGF12   | HIST1H3D  | KDM5C    | MLH1    | PAK3   | PRSS8    | SDHA    | TAF1    | XIAP     |        |
| BCORL1  | CDKN2C   | EGFL7   | FGF14   | HIST1H3E  | KDM6A    | MLH3    | PAK7   | PTCH1    | SDHAF2  | TAP1    | XPC      |        |
| BCR     | CEBPA    | EGFR    | FGF19   | HIST1H3F  | KDR      | MPL     | PALB2  | PTEN     | SDHB    | TAP2    | XPO1     |        |
| BIRC3   | CENPA    | EIF1AX  | FGF23   | HIST1H3G  | KEAP1    | MRE11   | PARK2  | PTGS2    | SDHC    | TAPBP   | XRCC1    |        |
| BLM     | CHD2     | EIF4A2  | FGF3    | HIST1H3H  | KEL      | MRE11A  | PARP1  | PTP4A1   | SDHD    | TAPBPL  | XRCC2    |        |
| BMP1A   | CHD4     | EIF4E   | FGF4    | HIST1H3I  | KIT      | MSH2    | PARP2  | PTPN11   | SESN1   | TBX3    | XRCC5    |        |
| BRAF    | CHEK1    | ELF3    | FGF6    | HIST1H3J  | KLF4     | MSH3    | PARP3  | PTPRD    | SESN2   | TCEB1   | YAP1     |        |
| BRCA1   | CHEK2    | EP300   | FGFR1   | HIST2H3C  | KLHL6    | MSH6    | PAX5   | PTPRO    | SESN3   | TCF3    | YES1     |        |
| BRCA2   | CIC      | EPAS1   | FGFR2   | HIST2H3D  | KMT2A    | MSI1    | PBRM1  | PTPRS    | SETD2   | TCF7L2  | ZBTB2    |        |

The DNA panel is a hybridization capture-based NGS panel to detect single nucleotide variants (SNVs), insertion and deletion alterations (InDels), and copy number alterations (CNAs) involved in 639 cancer-associated genes in tumors. This panel is designed to provide mutation profiling of patients with solid tumors.

**Table S2** Primer sequences list

| Primer        | Sequences (5'→3')                    |
|---------------|--------------------------------------|
| H-GAPDH-F     | GGAGCGAGATCCCTCCAAAAT                |
| H-GAPDH-R     | GGCTGTTGTCATACTTCTCATGG              |
| H-ETV1-F      | TGGCAGTTTTTGGTAGCTCTTC               |
| H-ETV1-R      | CGGAGTGAACGGCTAAGTTTATC              |
| H-NOTCH1-F    | TGGACCAGATTGGGGAGTTC                 |
| H-NOTCH1-R    | GCACACTCGTCTGTGTTGAC                 |
| H-NOTCH2-F    | CCTTCCACTGTGAGTGTCTGA                |
| H-NOTCH2-R    | AGGTAGCATCATTCTGGCAGG                |
| H-ASCL1-F     | CGCGGCCAACAAAGAAGATG                 |
| H-ASCL1-R     | CGACGAGTAGGATGAGACCG                 |
| H-HES1-F      | CCTGTCATCCCCGTCTACAC                 |
| H-HES1-R      | CACATGGAGTCCGCCGTAA                  |
| EGFR-WT-F     | CTCGGATCCGCCACCATGCGACCCTCCGGGACGGC  |
| EGFR-WT-R     | CCCTCTAGACTCGAGTGCTCCAATAAATTCAGTCTT |
| EGFR-L858R -F | CTCGGATCCGCCACCATGCGACCCTCCGGGACGGC  |
| EGFR-L858R -R | CCCTCTAGACTCGAGTGCTCCAATAAATTCAGTCTT |
| EGFR-T790M -F | CTCGGATCCGCCACCATGCGACCCTCCGGGACGGC  |
| EGFR-T790M -R | CCCTCTAGACTCGAGTGCTCCAATAAATTCAGTCTT |
| ETV1-WT-F     | CTCGGATCCGCCACCATGGATGGATTTTATGACCAG |
| ETV1-WT-R     | CCCTCTAGACTCGAGATACACGTAGCCTTCGTTGTA |
| ETV1-E462Q-F  | CTCGGATCCGCCACCATGGATGGATTTTATGACCAG |
| ETV1-E462Q-R  | CCCTCTAGACTCGAGATACACGTAGCCTTCGTTGT  |
| ETV1-P159S-F  | CTCGGATCCGCCACCATGGATGGATTTTATGACCAG |
| ETV1-P159S-R  | CCCTCTAGACTCGAGATACACGTAGCCTTCGTTGT  |

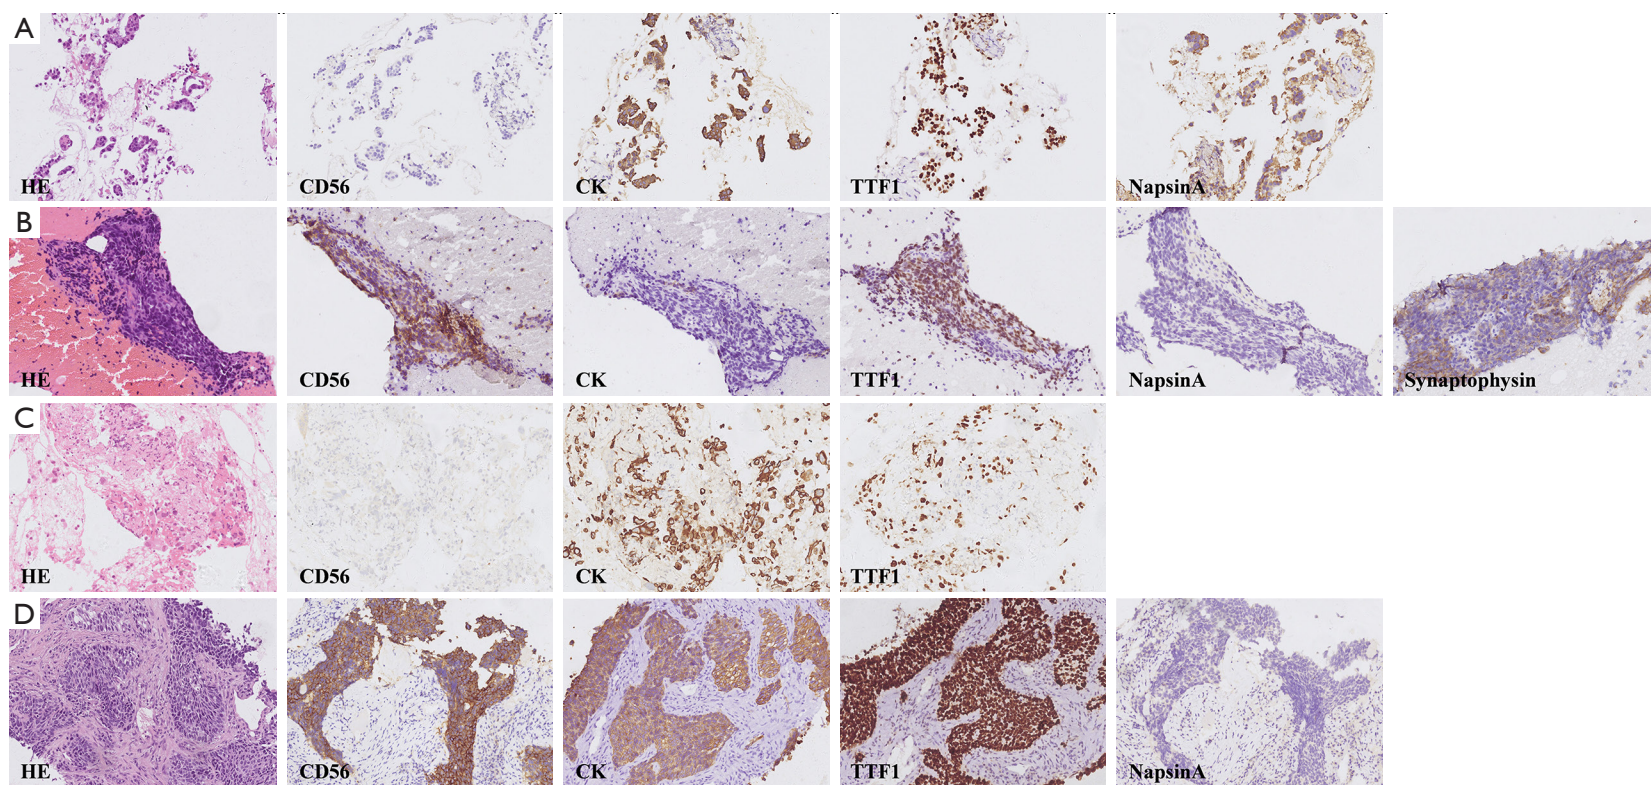

**Figure S1** Pathological findings of the patients. (A) LUAD histology of case 1 before osimertinib treatment. IHC was strongly positive for CK, TTF1, and NapsinA, and negative for CD56 (200×). (B) Hematoxylin & eosin staining showed that the cells were SCLC phenotype. IHC was positive for CD56 and synaptophysin, +/- for CK, partially positive for TTF1, and negative for NapsinA (200×). (C) LUAD histology of case 2 before *EGFR*-TKI treatment. IHC was strongly positive for CK and TTF1, and negative for CD56 (200×). (D) Re-biopsy after TKI resistance showed SCLC transformation. IHC was positive for CD56, CK, TTF1, and NapsinA (200×).

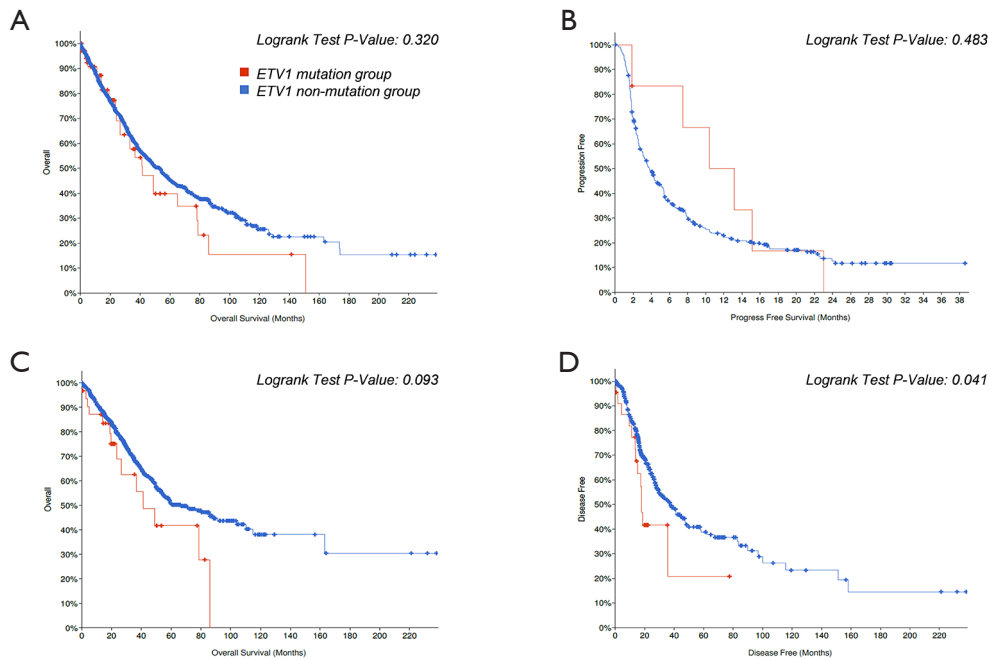

**Figure S2** Survival association analysis of *ETV1* mutations. (A) Kaplan-Meier OS analysis for tumor patients with and without *ETV1* mutations in the TCGA cohorts. (B) PFS for tumor patients with and without *ETV1* mutations. (C,D) OS and DFS analysis for LUAD patients with and without *ETV1* mutations.

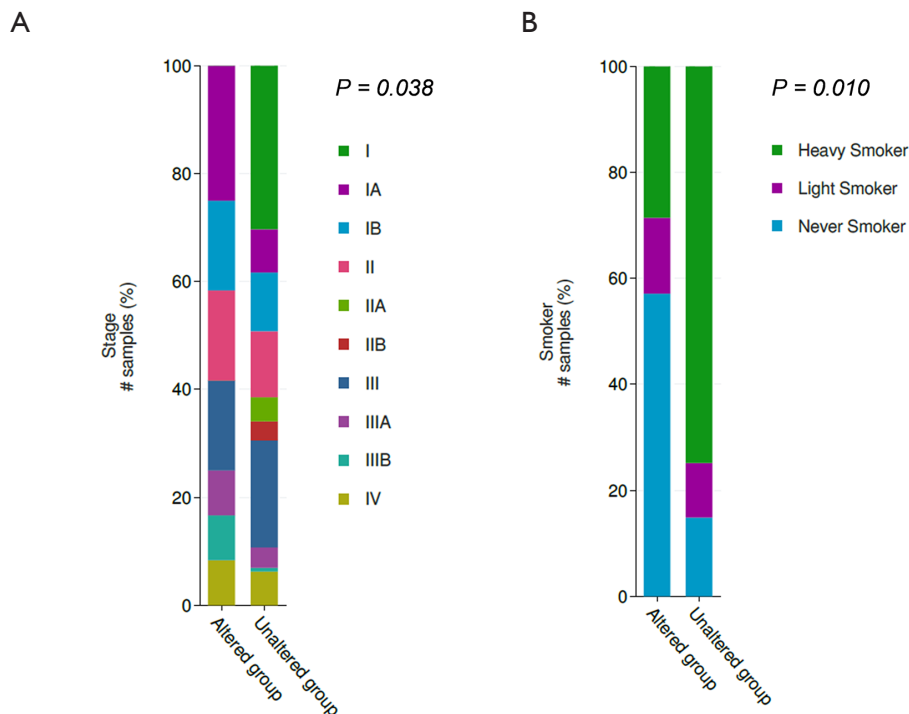

**Figure S3** Clinical correlation analysis of *ETV1* mutations. (A) Comparison of tumor stage between *ETV1* mutated and non-mutated LUAD. (B) Smoking status and *ETV1* mutations.
